# Supplementary material for: Can Regional Gender Ideologies Account for Variation of Gender Pay Gaps? The Case of Germany
Source: MDPI journal article supplement (doi:10.3390/socsci10090347), 2021-09-17
Supplement: s1 [file s1]

# Supplementary Material for Can Regional Gender Ideologies Account for Variation of Gender Pay Gaps? The Case of Germany

## Small Area Estimation

Let  $\mathbf{D}_p$  be an  $N \times R$  matrix indicating the membership of population unit  $i$  belonging to region  $r$  and let  $\mathbf{f}_p$  denote a vector of population values for gender ideologies of  $N$  observations. The population mean of factor scores of gender ideologies  $\bar{f}_d$  is predicted for each region based on knowledge about  $\mathbf{D}_p$ , on  $\mathbf{X}_p$  as an  $N \times k$  matrix for  $k$  auxiliary variables at the individual level and about  $\mathbf{Z}$  as a vector of the region-level predictors. Therefore, each matrix is partitioned into observed values and non-sampled values, the latter marked by the subscript  $j$ :

$$\mathbf{f}_p = \begin{bmatrix} \mathbf{f} \\ \mathbf{f}_j \end{bmatrix} = \begin{bmatrix} \mathbf{X} \\ \mathbf{X}_j \end{bmatrix} \boldsymbol{\beta} + \mathbf{Z}\boldsymbol{\gamma} + \begin{bmatrix} \mathbf{D} \\ \mathbf{D}_j \end{bmatrix} \mathbf{v} + \begin{bmatrix} \mathbf{e} \\ \mathbf{e}_j \end{bmatrix},$$

where the error matrix  $\mathbf{e}$  and random intercepts for region-averages  $\mathbf{v}$  are independent, with  $\mathbf{e} \sim N(0, \sigma^2)$  and  $\mathbf{v} \sim N(0, \sigma^2 \boldsymbol{\lambda})$ .  $\boldsymbol{\lambda}$  represents the ratio of within-region variance and total variance. Thereby, synthetic gender ideologies  $\mathbf{f}_j$  for non-sampled units will be estimated by the auxiliary information and their associations  $\boldsymbol{\beta}$  and  $\boldsymbol{\gamma}$  as well as by the region's random intercept  $v_d$  (based on the ratio of global and its region-level variance  $\lambda_r$ ). The lower the number of sampled units within a region  $n_r$  in comparison to its actual population size  $N_d$ , the more weight is given to the synthetic gender ideologies, imputing also reliable values for potentially non-sampled regions. Hierarchical Bayes estimates for the gender ideology index were obtained using uninformative priors on  $\boldsymbol{\beta}$ ,  $\boldsymbol{\gamma}$ ,  $\sigma^2$  and  $\boldsymbol{\lambda}$  (coefficients are shown in Table S1). Finally, a vector of region-level adjusted means of gender ideologies is predictors to reflect the region-specific gender ideologies.



Table S1: Small Area Estimation Coefficients and Modelfit

|                                               | Coefficient         |
|-----------------------------------------------|---------------------|
| Gender (1 = female)                           | −0.267**<br>(0.027) |
| Age (Ref.: 35-44):                            |                     |
| 18-24                                         | −0.055<br>(0.056)   |
| 25-34                                         | −0.027<br>(0.039)   |
| 45-54                                         | 0.131**<br>(0.032)  |
| 55-64                                         | 0.220**<br>(0.039)  |
| 65 and above                                  | 0.263**<br>(0.040)  |
| Urbanity (Ref.: Densd labor market region):   |                     |
| Rural labor market region                     | 0.043<br>(0.053)    |
| Metropolitan labor market region              | 0.041<br>(0.047)    |
| College Degree? (1 = yes)                     | −0.494**<br>(0.023) |
| Female Employment? (1 = yes)                  | −0.202**<br>(0.031) |
| Migrationbackground? (1 = yes)                | 0.425**<br>(0.026)  |
| Religious denomination (Ref.: None or others) |                     |
| Catholic                                      | 0.147**<br>(0.027)  |
| Ev. Protestant                                | 0.072**<br>(0.026)  |
| Subpart of Germany (1 = East)                 | −0.939**<br>(0.048) |
| Intercept                                     | 3.030**<br>(0.056)  |
| Within variance ( $\hat{\sigma}_e^2$ )        | 1.797**<br>(0.019)  |
| Variance ratio ( $\lambda$ )                  | 0.025               |
| $R^2$ (individual level)                      | 0.176               |
| AIC                                           | 62315               |
| Nr. of individuals                            | 18244               |
| Nr. of regions                                | 257                 |

Source: SOEP v35 and auxiliary information by Destatis, own estimation

Note: Levels of significance: \*  $p < 0.05$ , \*\*  $p < 0.01$ . Standard errors shown in parentheses.



Figure S1: Number of Observations of Individual-Level Gender Beliefs per Labor Market Region

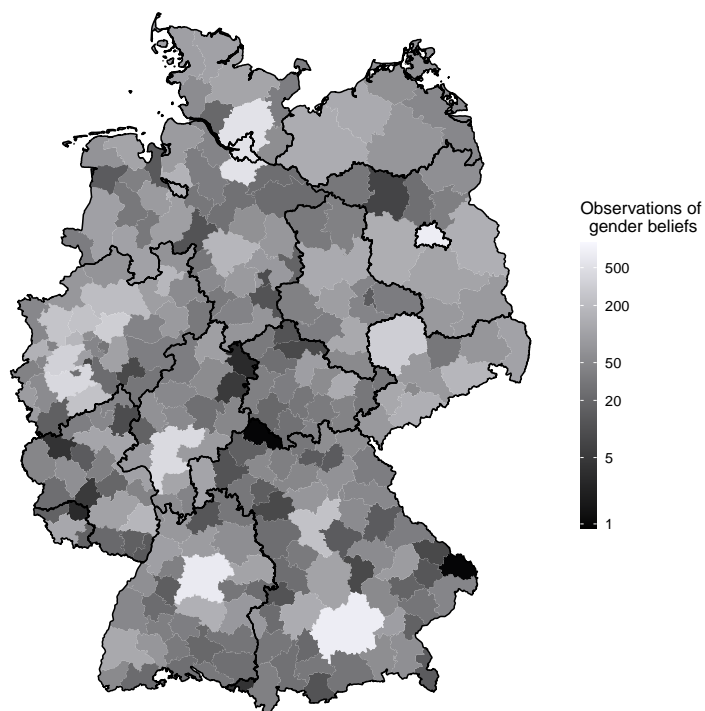

Source: SOEPv35; own estimation

Note: Number of observations lies between 1 and more than 500 in agglomerated regions (Stuttgart in the south-west, Munich in south-east, Berlin, and Hamburg)

Figure S2: Coefficient of Variation of Aggregated Gender Ideology Index and Small Area Estimates by Region's Sample Size

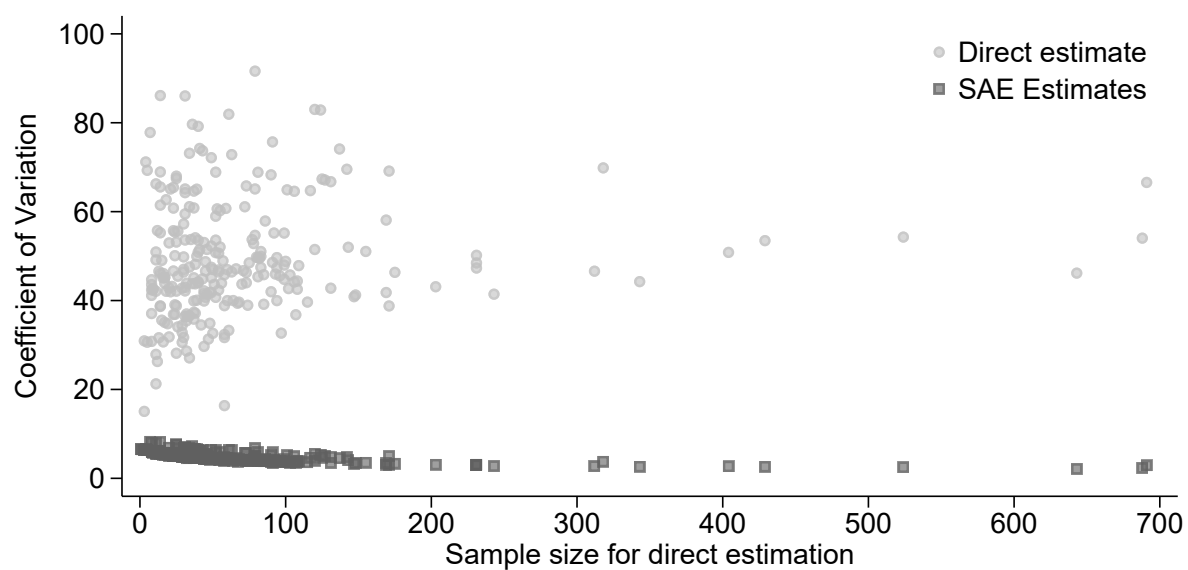

SOEP v35, own estimation



Table S2: Multi-level Models of Log Hourly Gross Wages by Gender, Gender Ideologies and two Mediating Variables

|                                        | (1)<br>Individual level index | (2)<br>Regional level childcare |
|----------------------------------------|-------------------------------|---------------------------------|
| Gender (1 = female) ( $\beta$ )        | -0.102**<br>(0.010)           | -0.114<br>(0.073)               |
| Gender ideology                        | 0.005<br>(0.010)              | -0.006<br>(0.011)               |
| Gender $\times$ gender ideology        | -0.014*<br>(0.007)            | -0.023*<br>(0.010)              |
| Individual level gender beliefs index  | -0.001<br>(0.005)             |                                 |
| Gender $\times$ individual level index | -0.032**<br>(0.007)           |                                 |
| Share of children < 6 in childcare     |                               | -0.245+<br>(0.139)              |
| Gender $\times$ share in childcare     |                               | 0.028<br>(0.119)                |
| sd(Gender) ( $\sigma_\gamma$ )         | 0.000<br>(0.000)              | 0.048**<br>(0.006)              |
| Socio-demogr. controls <sup>c</sup>    | Yes                           | Yes                             |
| Human capital controls <sup>c</sup>    | Yes                           | Yes                             |
| Segregation <sup>c</sup>               | Yes                           | Yes                             |
| Sectorial controls <sup>c</sup>        | Yes                           | Yes                             |
| AIC                                    | 5378.31                       | 39793.46                        |
| Counties                               | 255                           | 256                             |
| Individuals                            | 9013                          | 17515                           |
| Pearson-Years                          | 9013                          | 51365                           |

Source: SOEP v35, own estimation

Note: Levels of significance: +  $p < 0.1$ , \*  $p < 0.05$ , \*\*  $p < 0.01$ . Standard errors shown in parentheses. Random intercepts not shown.

<sup>a</sup> Controls are equivalent to Model 8 in Table 2.



Table S3: Robustness Checks of Multi-Level Models of Log Hourly Gross Wages by Gender and Gender Ideologies

|                                                |                                   |                      |                         |                                  | Within subparts     |                    |
|------------------------------------------------|-----------------------------------|----------------------|-------------------------|----------------------------------|---------------------|--------------------|
|                                                | (1)<br>Index w/o SAE <sup>a</sup> | (2)<br>$n_c \geq 30$ | (3)<br>Mundlak approach | (4)<br>Spatial dep. <sup>b</sup> | (5)<br>West         | (6)<br>East        |
| Gender (1 = female) ( $\beta$ )                | -0.096**<br>(0.007)               | -0.098**<br>(0.007)  | -0.076**<br>(0.009)     | -0.096**<br>(0.008)              | -0.093**<br>(0.013) | -0.078<br>(0.049)  |
| Gender ideology                                | 0.006<br>(0.007)                  | -0.001<br>(0.010)    | 0.000<br>(0.011)        | -0.006<br>(0.010)                | 0.001<br>(0.013)    | -0.014<br>(0.019)  |
| Gender $\times$ gender ideology                | -0.025**<br>(0.006)               | -0.025**<br>(0.006)  | -0.021**<br>(0.007)     | -0.018*<br>(0.008)               | -0.028*<br>(0.012)  | 0.008<br>(0.025)   |
| Spatial lag of gender ideology                 |                                   |                      |                         | 0.028*<br>(0.013)                |                     |                    |
| Gender $\times$ spatial lag of gender ideology |                                   |                      |                         | -0.014<br>(0.012)                |                     |                    |
| sd(Gender) ( $\sigma_\gamma$ )                 | 0.049**<br>(0.006)                | 0.047**<br>(0.006)   | 0.045**<br>(0.007)      | 0.049**<br>(0.006)               | 0.046**<br>(0.008)  | 0.053**<br>(0.012) |
| Socio-demogr. controls <sup>c</sup>            | Yes                               | Yes                  | Yes                     | Yes                              | Yes                 | Yes                |
| Human capital controls <sup>c</sup>            | Yes                               | Yes                  | Yes                     | Yes                              | Yes                 | Yes                |
| Segregation <sup>c</sup>                       | Yes                               | Yes                  | Yes                     | Yes                              | Yes                 | Yes                |
| Sectorial controls <sup>c</sup>                | Yes                               | Yes                  | Yes                     | Yes                              | Yes                 | Yes                |
| Individual level means of covariates           |                                   |                      | Yes                     |                                  |                     |                    |
| Cross-level interaction with urbanity          |                                   |                      |                         |                                  | Yes                 | Yes                |
| AIC                                            | 39795.26                          | 39649.98             | 19643.75                | 39791.43                         | 32475.00            | 6945.74            |
| Counties                                       | 256                               | 242                  | 256                     | 256                              | 203                 | 53                 |
| Person-Years                                   | 51365                             | 51121                | 51365                   | 51365                            | 41820               | 9545               |

Source: SOEP v35, own estimation

Note: Levels of significance: +  $p < 0.1$ , \*  $p < 0.05$ , \*\*  $p < 0.01$ . Standard errors shown in parentheses. Random intercepts not shown.

<sup>a</sup> Individual-level means of indicators on gender attitudes and aggregated within regions without SAE adjustment.

<sup>b</sup> Builds upon inverse distance matrix of centroids of all regions.

<sup>c</sup> Controls are equivalent to Model 8 in Table 2.
